**TITLE:** EVOLUTION OF CEREBRAL BLOOD FLOW WITH TIME DURING 1.4 AND 2.8% ISOFLURANE IN DOG

**AUTHORS:** J.E. Brian, Jr., M.D., R.W. McPherson, M.D., and R.J. Traystman, Ph.D.

**AFFILIATION:** Department of Anesthesiology and Critical Care Medicine, Johns Hopkins Medical Institutions, Baltimore, Maryland 21205.

**INTRODUCTION:** Previous studies have shown a decrease in cerebral blood flow (CBF) with time during anesthesia with volatile anesthetics (1,2). Those studies have not vigorously controlled factors such as cerebral perfusion pressure and carbon dioxide tension ( $\text{PaCO}_2$ ) which may effect CBF. In the present study, we studied two clinically useful concentrations of isoflurane (1.4 and 2.8%) administered for a prolonged period.

**METHODS:** Eight mixed sex dogs (20-25 kg) were initially anesthetized with thiopental (12 mg/kg, IV bolus), intubated and mechanically ventilated. All animals received 1.4% isoflurane (end tidal) during instrumentation. In group 1 (n=4) isoflurane was continued at 1.4% and in group 2 (n=4), isoflurane was increased to 2.8%. Mean arterial blood pressure (MAP), sagittal sinus pressure (Pss), and cerebrospinal fluid pressure (Pcsf) were recorded and CBF was measured using 15  $\mu$  radiolabeled microspheres (6 isotopes). Arterial and cerebrovenous  $\text{PO}_2$ ,  $\text{PCO}_2$ , and  $\text{O}_2$  content were measured and cerebral  $\text{O}_2$  uptake ( $\text{CMRO}_2$ ) was computed as arterial cerebrovenous  $\text{O}_2$  content x hemispheric CBF. Cerebral perfusion pressure (CPP) was computed as MAP - Pcsf or Pss, whichever was greater. In both groups, CPP was maintained constant during the study period (6 hours). All animals were allowed a 15 minute period to stabilize following instrumentation and data were determined on an hourly basis for 6 hours.

**RESULTS:** In both groups, initial data were determined about 1 hour after anesthesia induction. In group 1, total CBF was initially  $113 \pm 25$  ml/100gm/min and fell to 40% of control over the 6 hours of the study. All regions studied (cerebellum, medulla, caudate, white matter and cerebral hemispheres) demonstrated a similar proportional fall in flow. Flow decreased markedly during the first 2 hours and was stable thereafter (Fig 1). CPP was unchanged from control ( $95 \pm 4$  mmHg) during the course of the study. Cerebral vascular resistance (CVR) increased from  $1.0 \pm 0.1$  mmHg/ml/min/100gm to  $2.6 \pm 0.5$  mmHg/ml/min/100gm at 6 hours. The ratio of CBF/ $\text{CMRO}_2$  declined from 25 to 16. In group 2, total CBF decreased from  $175 \pm 24$  ml/100gm/min at 1 hour after induction to 52% of control at 6 hours. There was a more prolonged decay in flow than in group 1 and the maximum flow decrease did not occur until 5 hours after anesthesia induction. There was a similar decline in flow in all areas studied except for white matter which showed no change.  $\text{CMRO}_2$  was unchanged over the course of the experiment but the ratio of CBF/ $\text{CMRO}_2$  fell from  $63 \pm 8$  to  $25 \pm 6$  (Fig 2). Cerebral vascular resistance increased from  $0.5 \pm 0.1$  to  $1.2 \pm 0.4$  mmHg/ml/min/100gm.

**CONCLUSION:** CBF declines over time despite constant CPP,  $\text{PaCO}_2$  and arterial  $\text{O}_2$  content with both 1.4 and 2.8% isoflurane. These data suggest that such changes are related to intrinsic anesthetic properties. We found a similar percentage

decrease in CBF with 1.4 and 2.8% isoflurane but the decline in CBF was slower in the animals receiving 2.8% isoflurane. Thus, the effect of isoflurane on CBF is both dose and time dependent and the decrease in CBF/ $\text{CMRO}_2$  ratio with time suggests the decrease in CBF is not metabolically controlled.

Fig 1

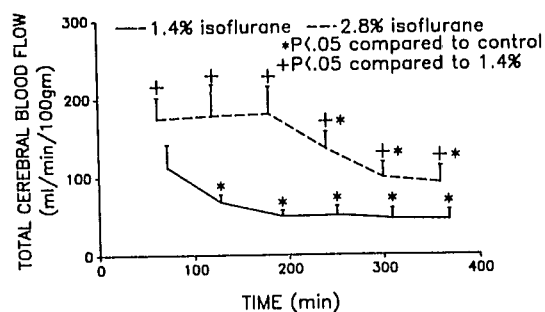

Fig 2

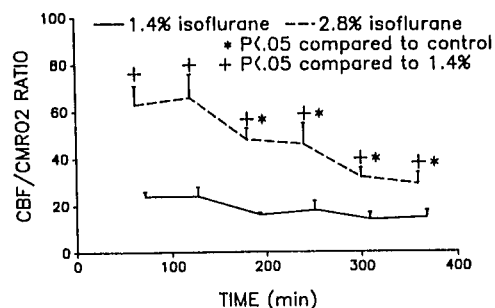

#### REFERENCES:

- Albrecht RF, Miletich DJ, Madala LR: Normalization of cerebral blood flow during prolonged halothane anesthesia. *Anesthesiology* 58:26-31, 1983.
- Turner DM, Kassell NF, Sasaki T, Comair YG, Boarini DJ, Back DO: Time-dependent changes in cerebral and cardiovascular parameters in isoflurane-nitrous oxide anesthetized dogs. *Neurosurgery* 14:135-141, 1984.

Supported by NS 20020.
